# Supplementary material for: Marine medaka ATP-binding cassette (ABC) superfamily and new insight into teleost Abch nomenclature
Source: PubMed Central journal article supplement (PMC4607974; doi:10.1038/srep15409), 2015-10-16

Supplementary file for:

## **Marine medaka ATP-binding cassette (ABC) superfamily and new insight into teleost Abch nomenclature**

**Chang-Bum Jeong<sup>a,b,#</sup>, Bo-Mi Kim<sup>a,#</sup>, Hye-Min Kang<sup>a</sup>, Ik-Young Choi<sup>c</sup>,  
Jae-Sung Rhee<sup>d,\*</sup>, Jae-Seong Lee<sup>a,\*</sup>**

<sup>a</sup> *Department of Biological Science, College of Science, Sungkyunkwan University, Suwon 440-746, South Korea*

<sup>b</sup> *Department of Chemistry, College of Natural Sciences, Hanyang University, Seoul 133-791, South Korea*

<sup>c</sup> *National Instrumentation Center for Environmental Management, College of Agriculture and Life Sciences, Seoul National University, Seoul 151-921, South Korea*

<sup>d</sup> *Department of Marine Science, College of Natural Sciences, Incheon National University, Incheon 406-772, South Korea*

---

<sup>#</sup>These authors contributed equally to this manuscript.

\*Corresponding authors: jslee2@skku.edu (J.-S. Lee<sup>a</sup>), jsrhee@inu.ac.kr (J.-S. Rhee<sup>d</sup>)

**Table S1.** Information on the putative *abcb1/4* genes in teleosts registered in GenBank database and/or Ensembl genome browser.

| <b>Species</b>                             | <b>Gene name</b>              | <b>Ensembl Gene ID</b>                                         | <b>GenBank No.</b>               |
|--------------------------------------------|-------------------------------|----------------------------------------------------------------|----------------------------------|
| <i>Astyanax mexicanus</i>                  | Abcb4                         | ENSAMXG00000016165                                             |                                  |
| <i>Danio rerio</i>                         | Abcb4                         | ENSDARG00000010936                                             | AFR69055                         |
| <i>Gadus morhua</i>                        | Abcb4                         | ENSGMOG00000015175                                             |                                  |
| <i>Gasterosteus aculeatus</i>              | Abcb4                         | ENSGACP00000012286                                             |                                  |
| <i>Ictalurus punctatus</i>                 | Abcb1                         |                                                                | JT312655                         |
| <i>Latimeria chalumnae</i>                 | Abcb4                         | ENSLACG00000008552                                             |                                  |
| <i>Lepisosteus oculatus</i>                | Abcb4                         | ENSLOCG00000010373                                             |                                  |
| <i>Oncorhynchus mykiss</i>                 | Abcb1                         |                                                                | AAW56424                         |
| <i>Oreochromis niloticus</i> <sup>1</sup>  | P-glycoprotein<br>Abcb4       | ENSONIP00000007731                                             | BAM36701                         |
| <i>Oryzias latipes</i> <sup>2</sup>        | Abcb1<br>Abcb4                | ENSORLP00000011622                                             | 101171435                        |
| <i>Petromyzon marinus</i> <sup>3</sup>     | Abcb1<br>Abcb4                | ENSPMAG00000009053                                             | AKC42134                         |
| <i>Poecilia formosa</i>                    | Abcb4                         | ENSPFOG00000016540                                             |                                  |
| <i>Poeciliopsis lucida</i>                 | Abcb1                         |                                                                | ADQ20481                         |
| <i>Scleropages formosus</i>                | Abcb4                         |                                                                | KKX05686                         |
| <i>Takifugu rubripes</i>                   | Abcb4                         | ENSTRUG00000005770                                             |                                  |
| <i>Tetraodon nigroviridis</i> <sup>4</sup> | Abcb4-1<br>Abcb4-2<br>Abcb4-3 | ENSTNIG00000018356<br>ENSTNIG00000018357<br>ENSTNIG00000018358 | CAG11904<br>CAG11905<br>CAG11906 |
| <i>Trematomus bernacchii</i>               | Abcb1                         |                                                                | ACX30417                         |
| <i>Xiphophorus maculatus</i>               | Abcb4                         | ENSXMAG00000006743                                             |                                  |

<sup>1</sup>A single gene annotated with different names.

<sup>2</sup>A single gene annotated with different names.

<sup>3</sup>A single gene annotated with different names.

<sup>4</sup>Three genes annotated individually.

**Table S2.** Amino acid similarity and identity comparisons for *Oryzias melastigma* and *Ictalurus punctatus abcc5* genes, which are separated into distinctive clades. Abbreviations: Om, *Oryzias melastigma*; Ip, *Ictalurus punctatus*.

|              |              | Similarity (%) |          |         |              |
|--------------|--------------|----------------|----------|---------|--------------|
|              |              | OmAbcc5a       | OmAbcc5b | IpAbcc5 | IpAbcc5-like |
| Identity (%) | OmAbcc5a     | 1.00           | 0.66     | 0.78    | 0.66         |
|              | OmAbcc5b     | 0.55           | 1.00     | 0.68    | 0.81         |
|              | IpAbcc5      | 0.71           | 0.56     | 1.00    | 0.68         |
|              | IpAbcc5-like | 0.55           | 0.71     | 0.57    | 1.00         |

**Table S3.** Amino acid similarity and identity comparisons for *Oryzias melastigma*, *Oryzias latipes*, and *Danio rerio abcg2* genes, which are separated into distinctive clades. Abbreviations: Om, *Oryzias melastigma*; Ol, *Oryzias latipes*; Dr, *Danio rerio*.

|              |              | Similarity (%) |           |              |           |           |              |          |          |          |          |
|--------------|--------------|----------------|-----------|--------------|-----------|-----------|--------------|----------|----------|----------|----------|
|              |              | OmAbcg2-1      | OmAbcg2-2 | OmAbcg2-like | OlAbcg2-1 | OlAbcg2-2 | OlAbcg2-like | DrAbcg2a | DrAbcg2b | DrAbcg2c | DrAbcg2d |
| Identity (%) | OmAbcg2-1    | 1.00           | 0.76      | 0.60         | 0.92      | 0.75      | 0.60         | 0.81     | 0.60     | 0.59     | 0.68     |
|              | OmAbcg2-2    | 0.66           | 1.00      | 0.59         | 0.72      | 0.95      | 0.59         | 0.76     | 0.59     | 0.58     | 0.69     |
|              | OmAbcg2-like | 0.48           | 0.46      | 1.00         | 0.57      | 0.58      | 0.95         | 0.61     | 0.81     | 0.77     | 0.54     |
|              | OlAbcg2-1    | 0.89           | 0.63      | 0.45         | 1.00      | 0.71      | 0.57         | 0.76     | 0.56     | 0.55     | 0.64     |
|              | OlAbcg2-2    | 0.65           | 0.93      | 0.46         | 0.62      | 1.00      | 0.58         | 0.74     | 0.59     | 0.57     | 0.68     |
|              | OlAbcg2-like | 0.48           | 0.93      | 0.93         | 0.45      | 0.46      | 1.00         | 0.61     | 0.83     | 0.77     | 0.54     |
|              | DrAbcg2a     | 0.74           | 0.66      | 0.48         | 0.69      | 0.64      | 0.48         | 1.00     | 0.60     | 0.60     | 0.68     |
|              | DrAbcg2b     | 0.48           | 0.46      | 0.73         | 0.44      | 0.46      | 0.75         | 0.48     | 1.00     | 0.74     | 0.54     |
|              | DrAbcg2c     | 0.48           | 0.46      | 0.68         | 0.44      | 0.45      | 0.69         | 0.48     | 0.66     | 1.00     | 0.53     |
|              | DrAbcg2d     | 0.58           | 0.61      | 0.43         | 0.55      | 0.60      | 0.44         | 0.58     | 0.43     | 0.42     | 1.00     |

## Supplementary Figure Legends

**Figure S1.** Schematic representation of the conserved domain analysis of 50 *O. melastigma* ABC transporters. NBD in an ellipse indicates nucleotide binding domains (also referred to as an ATP-binding cassette), and TM in a rectangle represents transmembrane domains (TMDs). Numbers in brackets refer to the number of ABC proteins in each subfamily.

**Figure S2.** Phylogenetic analysis of the *O. melastigma* Abca subfamily, compared with those of other species, using the Bayesian method. Numbers at branch nodes represent the confidence level of posterior probability. Species abbreviations: Dr, *Danio rerio*; Hs, *Homo sapiens*; Ip, *Ictalurus punctatus*; Mm, *Mus musculus*; Ol, *Oryzias latipes*; Om, *Oryzias melastigma*; On, *Oreochromis niloticus*; Tn, *Tetraodon nigroviridis*.

**Figure S3.** Phylogenetic analysis of the *O. melastigma* Abcb subfamily, compared with those of other species, using the Bayesian method. Numbers at branch nodes represent the confidence level of posterior probability. Dr, *Danio rerio*; Hs, *Homo sapiens*; Ip, *Ictalurus punctatus*; Mm, *Mus musculus*; Ol, *Oryzias latipes*; Om, *Oryzias melastigma*; On, *Oreochromis niloticus*; Tn, *Tetraodon nigroviridis*.

**Figure S4.** Phylogenetic analysis of the *O. melastigma* Abcc subfamily, compared with those of other species, using the Bayesian method. Numbers at branch nodes represent the confidence level of posterior probability. Dr, *Danio rerio*; Hs, *Homo sapiens*; Ip, *Ictalurus punctatus*; Mm, *Mus musculus*; Ol, *Oryzias latipes*; Om, *Oryzias melastigma*; On, *Oreochromis niloticus*; Tn, *Tetraodon nigroviridis*.

**Figure S5.** Phylogenetic analysis of the *O. melastigma* Abcd subfamily, compared with those of other species, using the Bayesian method. In the case of *Danio rerio abcd2-2* and *Ictalurus punctatus abcd2*, the sequences were excluded as they disrupt overall distance values in the phylogenetic branches due to the partial cDNA sequences registered in GenBank. Numbers at branch nodes represent the confidence level of posterior probability. Dr, *Danio rerio*; Hs, *Homo sapiens*; Ip, *Ictalurus punctatus*; Mm,

*Mus musculus*; Ol, *Oryzias latipes*; Om, *Oryzias melastigma*; On, *Oreochromis niloticus*; Tn, *Tetraodon nigroviridis*.

**Figure S6.** Phylogenetic analysis of the *O. melastigma* Abce and Abcf subfamilies, compared with those of other species, using the Bayesian method. Numbers at branch nodes represent the confidence level of posterior probability. Dr, *Danio rerio*; Hs, *Homo sapiens*; Ip, *Ictalurus punctatus*; Mm, *Mus musculus*; Ol, *Oryzias latipes*; Om, *Oryzias melastigma*; On, *Oreochromis niloticus*; Tn, *Tetraodon nigroviridis*.

**Figure S7.** Phylogenetic analysis of the *O. melastigma* Abcg and Abch subfamilies, compared with those of other species, using the Bayesian method. Numbers at branch nodes represent the confidence level of posterior probability. Dr, *Danio rerio*; Hs, *Homo sapiens*; Ip, *Ictalurus punctatus*; Mm, *Mus musculus*; Ol, *Oryzias latipes*; Om, *Oryzias melastigma*; On, *Oreochromis niloticus*; Tn: *Tetraodon nigroviridis*.

**Figure S8.** Amino acid similarity of *Oryzias melastigma* and *Ictalurus punctatus abcc5* genes, which are separated into distinctive clades. Abbreviations: Om, *Oryzias melastigma*; Ip, *Ictalurus punctatus*.

**Figure S9.** An updated phylogenetic analysis of 50 *O. melastigma* ABC proteins with other species including arthropod *abch* genes, and three *abch* genes of invertebrates; Pacific oyster *abch* gene (*Crassostrea gigas*; EKC37771), acorn worm (*Saccoglossus kowalevskii*; XP\_006817503), and sea urchin (*Strongylocentrotus purpuratus*; XP\_003731550; also registered in the Sea urchin genome database (<http://www.echinobase.org>); ID: SPU\_026438). In addition, three putative *ABCH/Abch* members were incorporated to analyze their phylogenetic locations (highlighted with yellow color; sea urchin ABC transporter H family member 2-like (*S. purpuratus*; LOC100889169), the dolphin ABC transporter H family member 2-like (*Lipotes vexillifer*; LOC103069646), and the Tibetan antelope ABC transporter H family member 2-like (*Pantholops hodgsonii*; LOC102331264). Species abbreviations: Cg, *Crassostrea gigas*; Dm, *Drosophila melanogaster*; Dp, *Daphnia pulex*; Dr, *Danio rerio*; Hs, *Homo sapiens*; Ip, *Ictalurus punctatus*; Mm, *Mus musculus*; Ol, *Oryzias latipes*; Om, *Oryzias melastigma*; On, *Oreochromis niloticus*; Sk, *Saccoglossus*

*kowalevskii*; Sp, *Strongylocentrotus purpuratus*; Tb, *Tribolium castaneum*; Tj, *Tigriopus japonicus*; Tn, *Tetraodon nigroviridis*.

**Figure S10.** Enlarged phylogenetic clade of the Abch subfamily from **Fig. S9**. Species abbreviations: Cg, *Crassostrea gigas*; Dm, *Drosophila melanogaster*; Dp, *Daphnia pulex*; Dr, *Danio rerio*; Om, *Oryzias melastigma*; Sk, *Saccoglossus kowalevskii*; Sp, *Strongylocentrotus purpuratus*; Tb, *Tribolium castaneum*; Tj, *Tigriopus japonicus*; Tn, *Tetraodon nigroviridis*.

**Figure S11.** Enlarged phylogenetic clade of the Abcf and Abcg subfamilies from **Fig. S9**. Species abbreviations: Dr, *Danio rerio*; Hs, *Homo sapiens*; Ip, *Ictalurus punctatus*; Mm, *Mus musculus*; Ol, *Oryzias latipes*; Om, *Oryzias melastigma*; On, *Oreochromis niloticus*; Tn, *Tetraodon nigroviridis*.

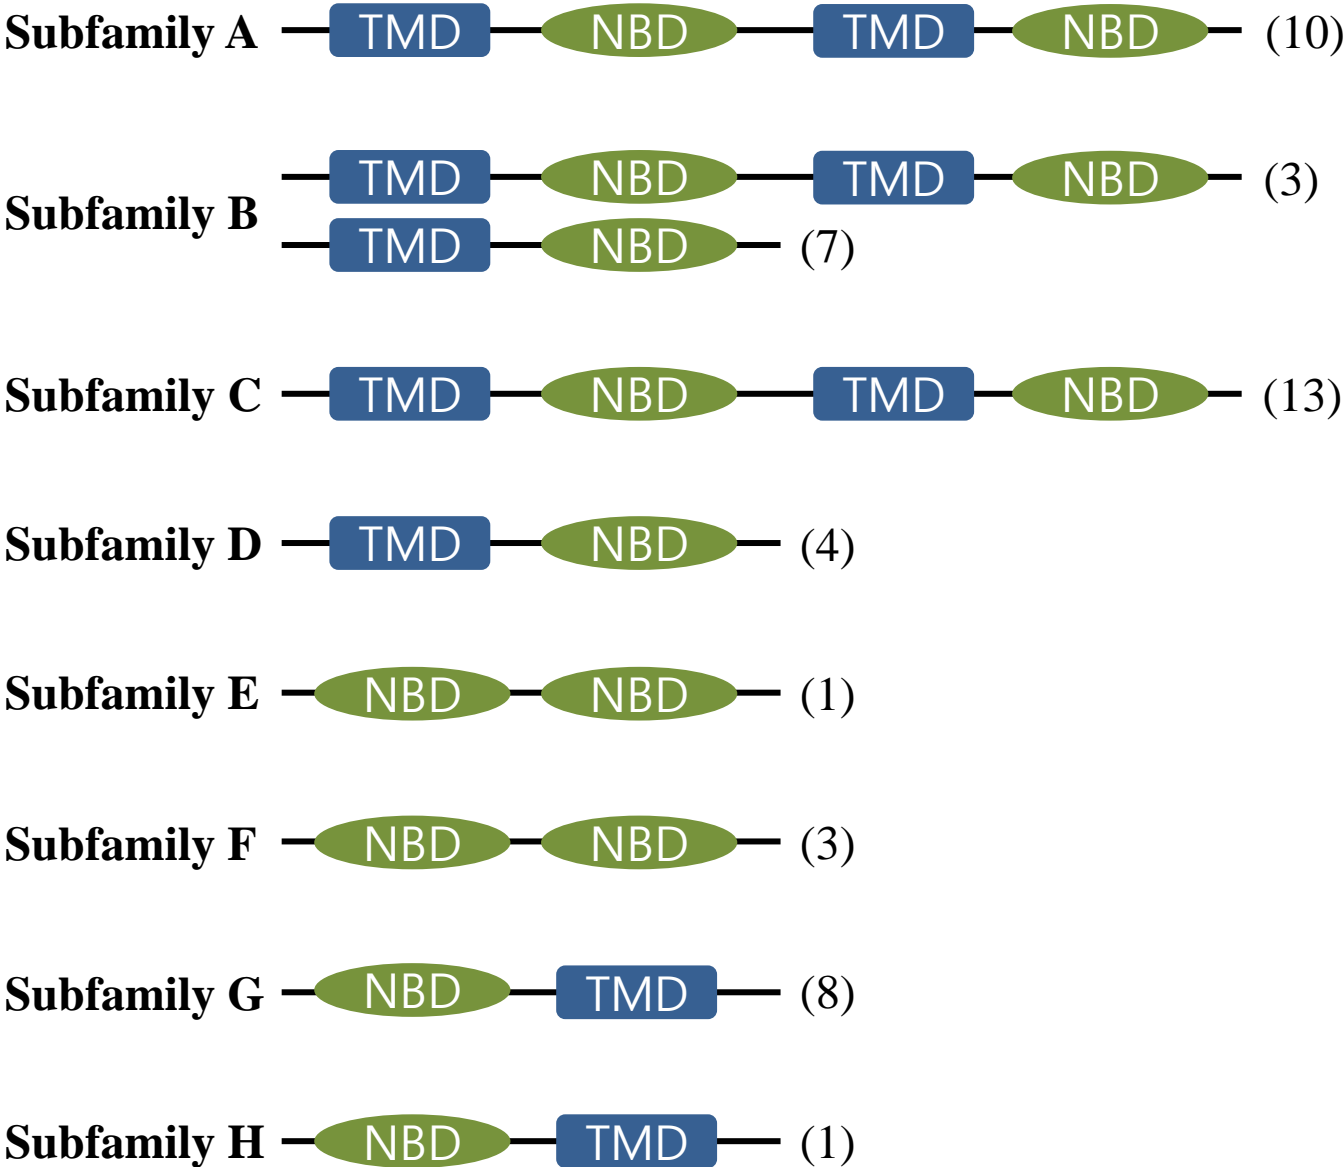



# Subfamily A

Fig. S2

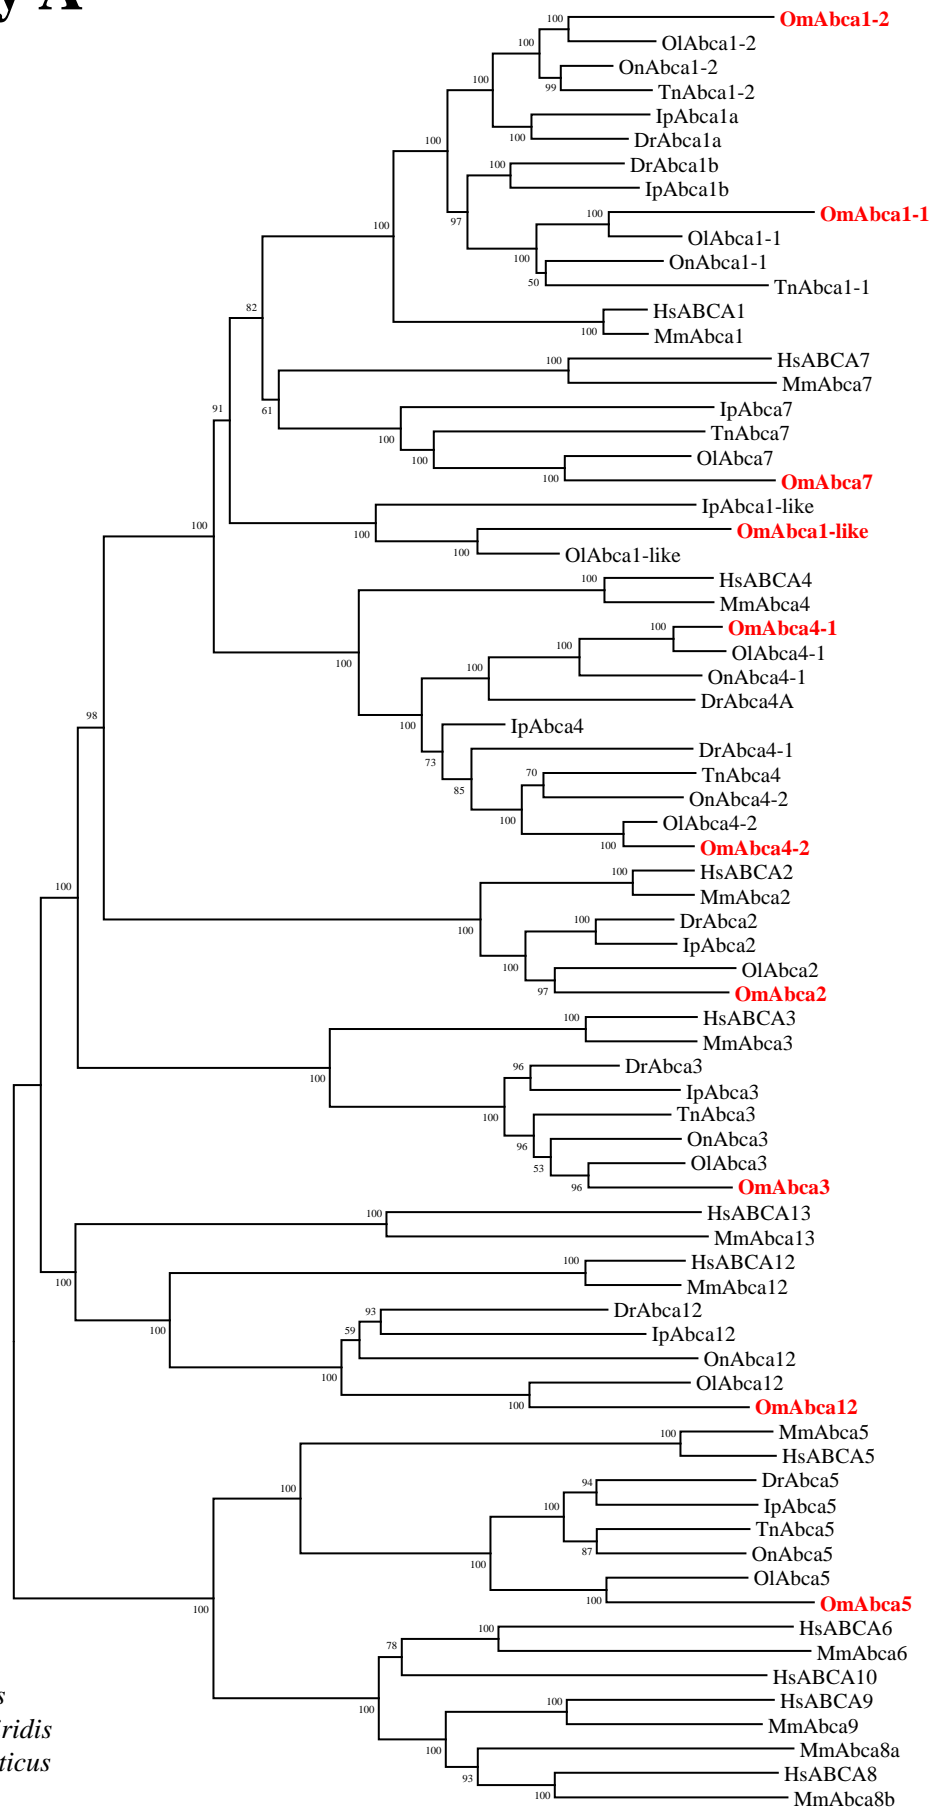

Hs: *Homo sapiens*

Mm: *Mus musculus*

Dr: *Danio rerio*

Ip: *Ictalurus punctatus*

Tn: *Tetraodon nigroviridis*

On: *Oreochromis niloticus*

Ol: *Oryzias latipes*

Om: *Oryzias melastigma*

# Subfamily B

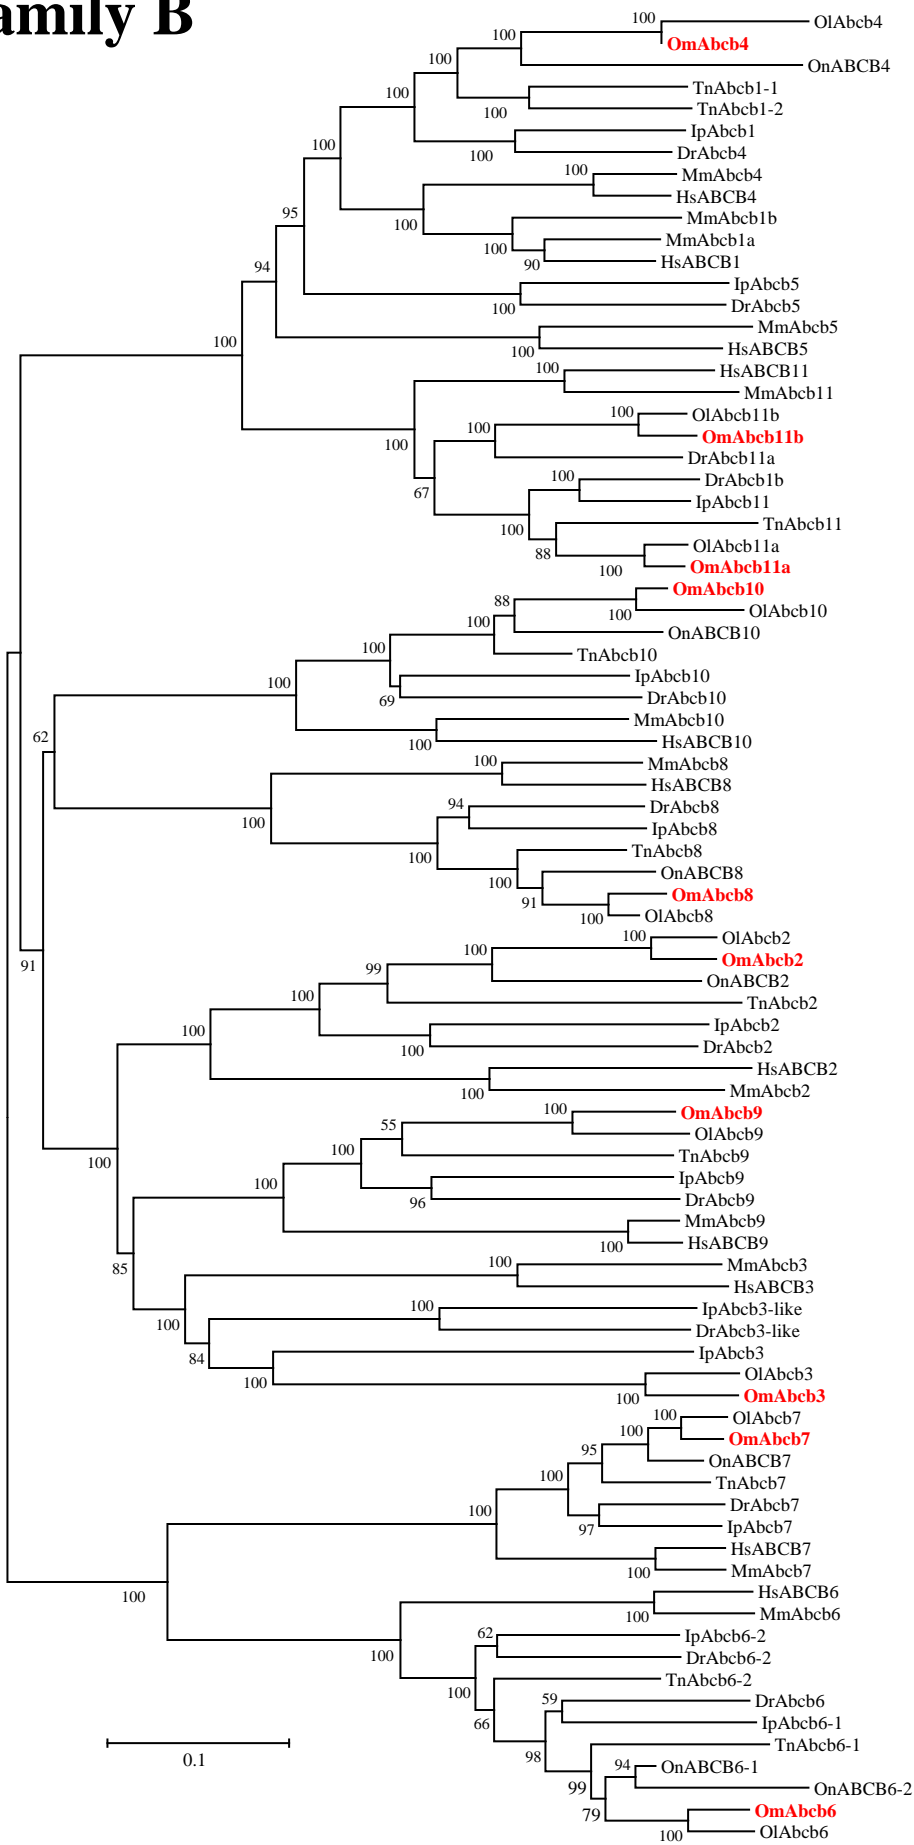

# Subfamily C

Fig. S4

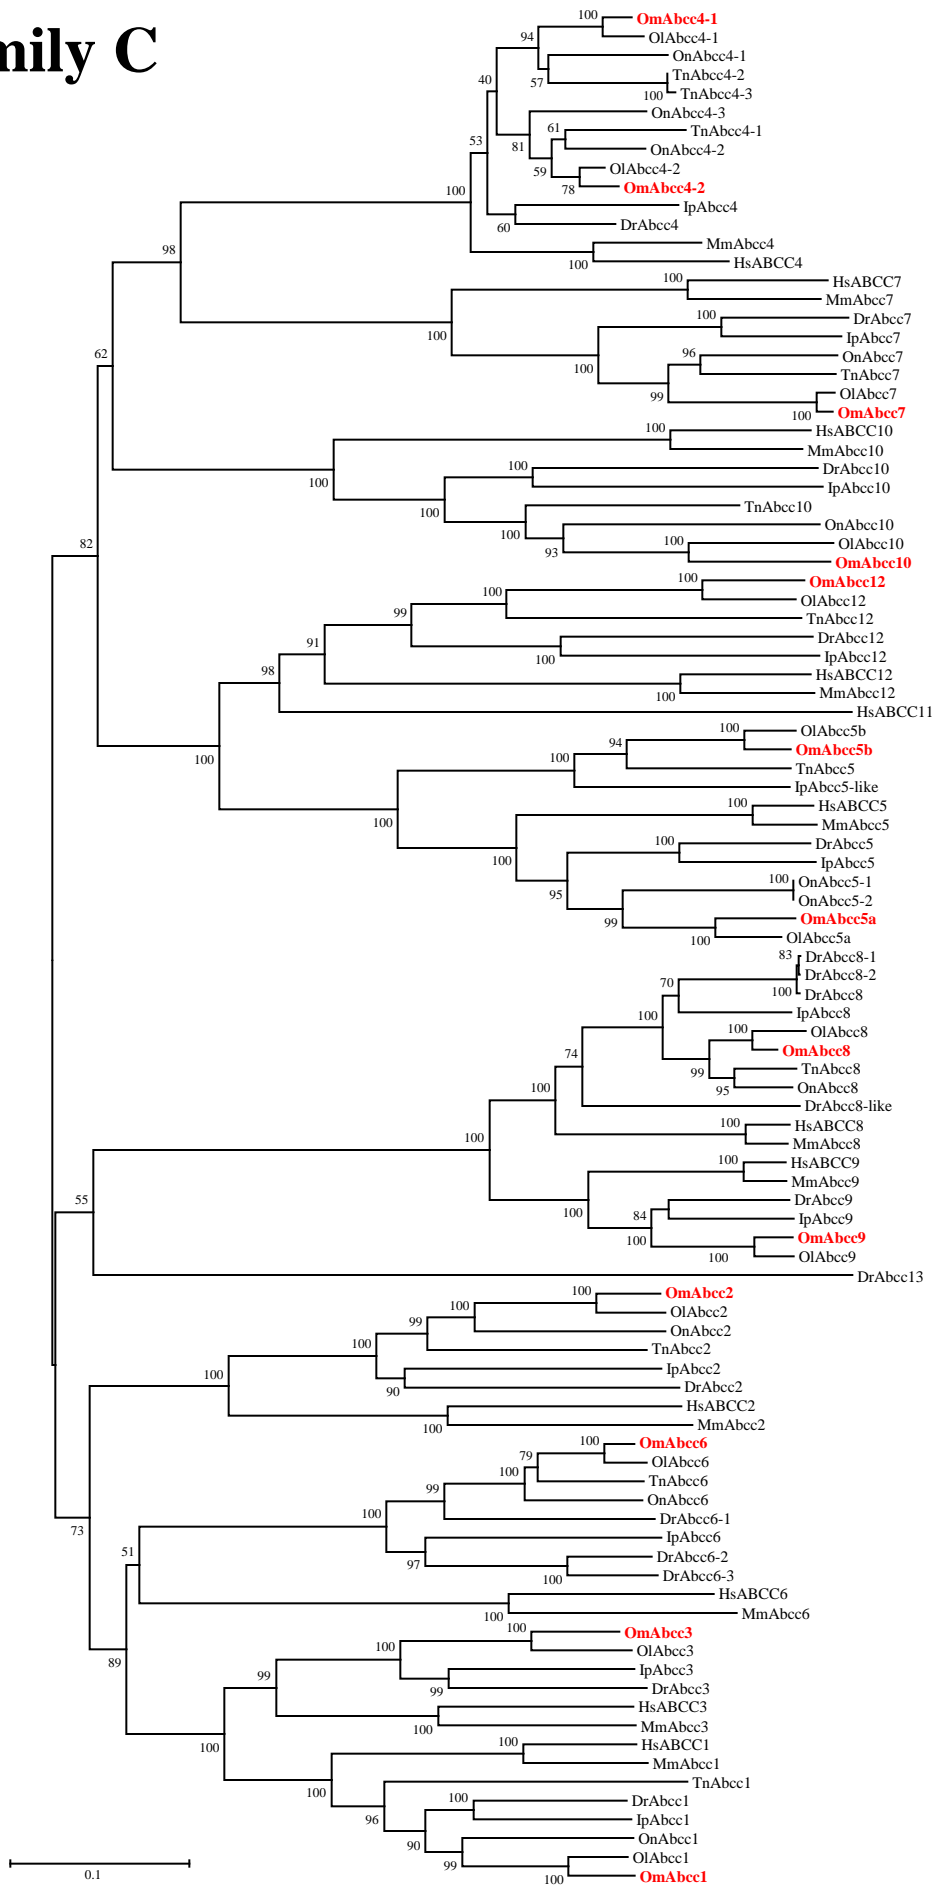

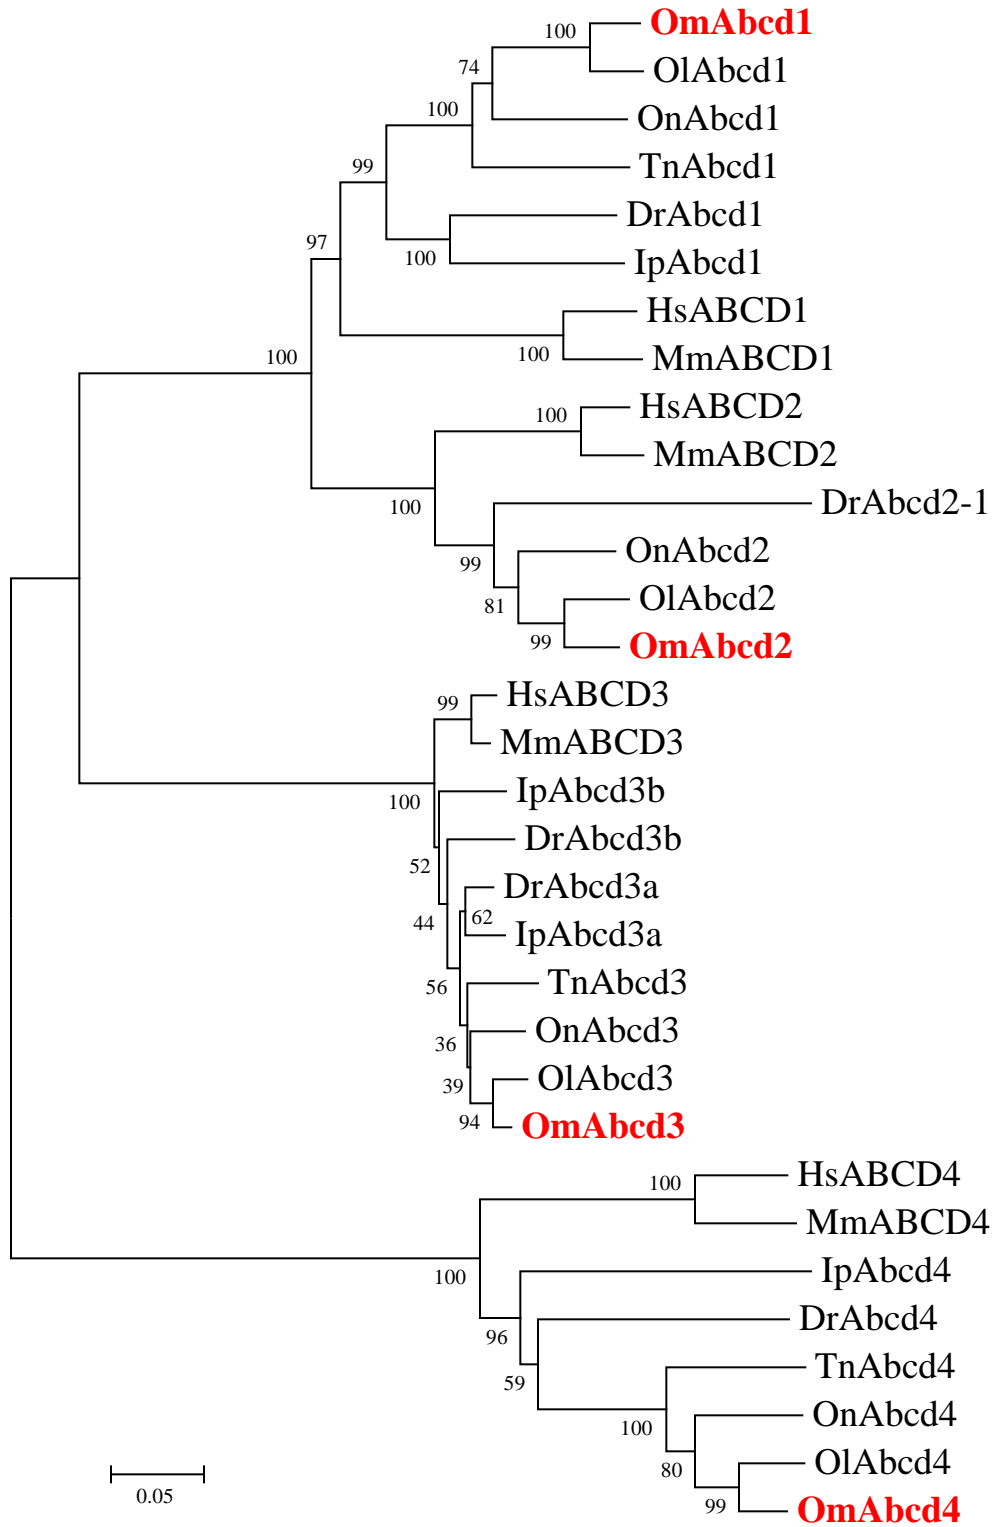

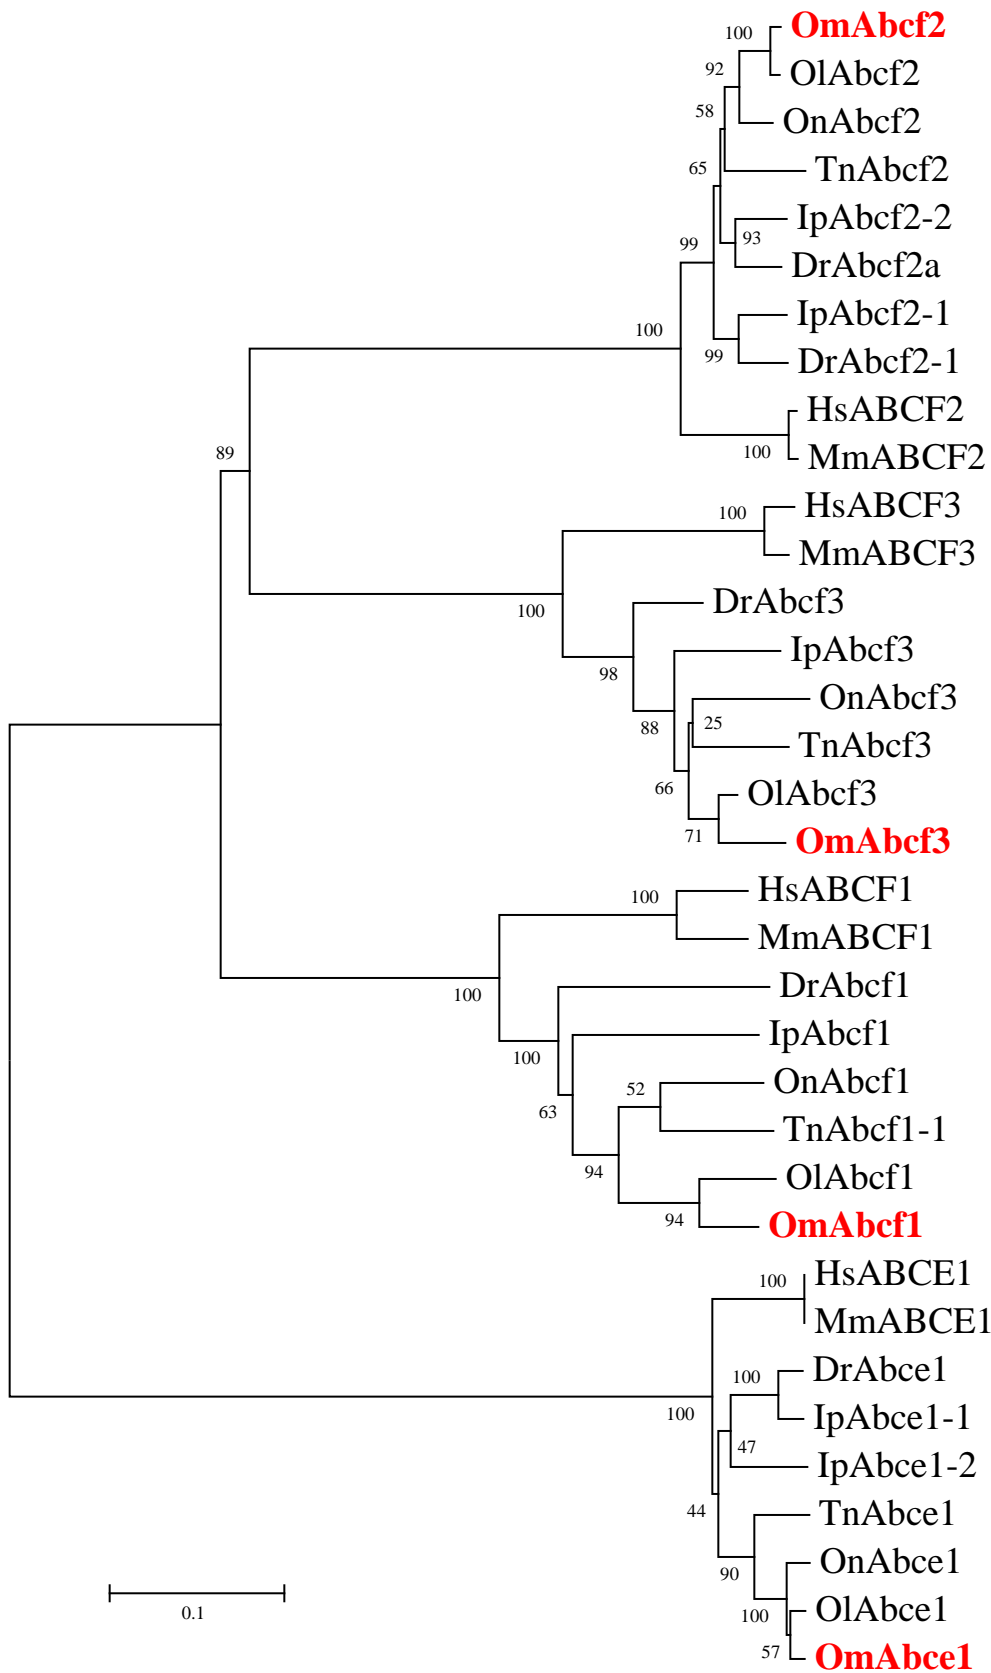

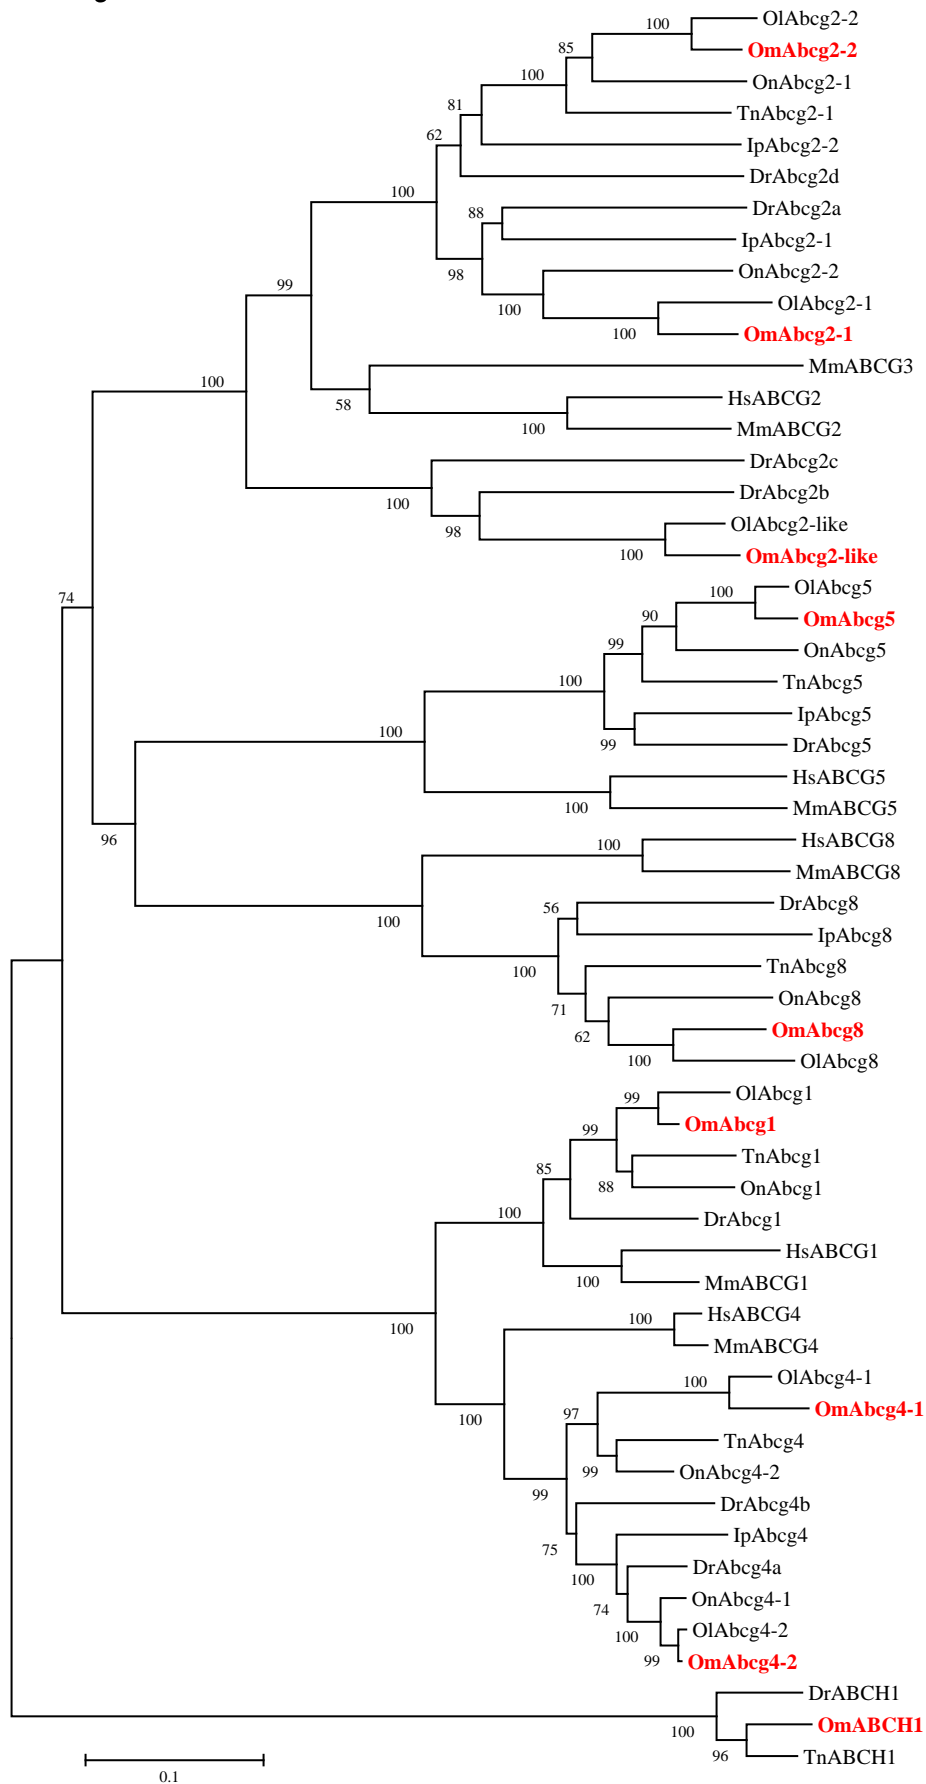

**Subfamily G**

**Subfamily H**

**OmAbcc5a** MKQHSR---S---SEVSEQQVVLGSGVDG---SAPHYCPKSEEGGAED---FSEGGATDSHPVTEAGFSFNABHWLTPLAVHACRKGGLLEDVWVWSQFERCHGNSIRTKL  
**OmAbcc5b** MFDDAEVGRVCE---LSLSEPPDLQEEBEE---PETSPEGPRRCGRVRSKQLIRPFTHKKHCPVDNAGFSFMTLHWLSPLACMWRASSSVDWDVWLSQHEASTVNGCRLES  
**IpAbcc5** MKHDIKDCDLAPFPAYRAVPSREVLPAnevDHYQLTNVQDALETAGRAGGGFPLDACSGAHAKLEDDEGGRSKHVESVGLKPFPS-SKHHHPVDNAGFSFMTLSWLTPLAKTAPRKGGLLEDVWVWSQHEASTVNGCRLES  
**IpAbcc5-like** MKHDDPEAVIRVE---LPSCEPTEQFDLED---LDYETR---RRGRVRESHLIKPFPETHKHHCPVDNAGFSFMTLHWLSPLAAWRAKASSLMTDWDVWLSQHEASTVNGCRLE

**OmAbcc5a** LWEDELKVKCG-ASLQSVVWFCFRVRFESLITLITLGLAGFSGPAFVVRRLLEYLQCESLITACMLLNLGLLVWELMRWSLALWAINVRFGLRRLGALSLSAFKILLRSVRLHSVGLVNMCCSDGQRMFEAPVGSF  
**OmAbcc5b** LWNSELNMRGRCASLIRVWRFCRTRMLVAFSLLIDLVAGFEGFALLVRLLEYSQSPSSWRHGLLARGDLTELIRSWSLALWAVNYRAARLRGALITGAFKILLRSVRLHSVGLINMCCSDGQRLVWAVSVGL  
**IpAbcc5** LWEKELNERGCG-ASLIRVWVWFCFRTRLLISITLIMVLTGLAGFSGPAFVVRRLLEYLQCESLITACMLLNLGGLLTELIRSWSLALWAINVRFGLRRLGALITGAFKILLRSVRLHSVGLINMCCSDGQRMFEAPVGSF  
**IpAbcc5-like** LWQPELLRKRCDCASLQVWRFCRTRLLVALLLILFVWVATGIPALLIRALLEYQSSVWVWVWGLPLVGLTELTELIRSWTALWAINVRYRAARLRGALITGAFKILLRSVRLHSVGLINICCCSDGQRLVAVSLGL

**OmAbcc5a** LAGGPLVAPLGTBYNLYLGLPESLLGSAIFILFYPMMSFSRMTAFRRKGVARTDRRVQRMNEILSYIKFKMYVAVRASFQVQVVRBEERRILELTCYQSLITVGVAPVWVVIASVATFSAHMLGLDNLTAQAFTVAVFN  
**OmAbcc5b** SMTFALKVTELAVALSFGSIANRFRQFVLLMDDREIVLVKMPDLNDVPELDTLWCKTKLN---VLPK---KQGLMKRKLNR---FMSEELTKS-CRANPNICSLLNMEQESQSTTIC-----ASCSTHKLQK  
**IpAbcc5** LAGGPLVAVLGMAYNLSVGLPESLLGSAVIFILFYPMMSRSLTAFRRKGVARTDRRVQRMNEILSYIKFKMYVAVRASFQVQVVRBEERRILELTCYQSLITVGVAPVWVVIASVATFSAHMLGLDNLTAQAFTVAVFN  
**IpAbcc5-like** HGGPLVGLPLSYNTEHLGPARIVGSIIFILFYPMMSLRSRTAFRRKGVARTDRRVQRMNEILSYIKFKMYQESAFAGVAVRBEERRILELTCYQSLITVGVAPVWVVIASVATFTHALGNLTAQAFTVAVFN

**OmAbcc5a** AMTFALKVTELEVKLSLSEAVAFERFKLILPEMDTRASPSFLVAVMSAASLAWGEGQS--IQSEF---CVKLSGARVCL---PRSRDGLLQEEEEBEVTGSLIKGPDLPSSLSEEEEEEDACFPILGPPRFRQLS  
**OmAbcc5b** SMTFALKVTELAVALSFGSIANRFRQFVLLMDDREIVLVKMPDLNDVPELDTLWCKTKLN---VLPK---KQGLMKRKLNR---FMSEELTKS-CRANPNICSLLNMEQESQSTTIC-----ASCSTHKLQK  
**IpAbcc5** AMTFALKVTELEVKLSLSEAVAFERFKSVLLNAEVRITREQPSAHSISVLCGASLAWTGGHS--AQPIFRGPTVGLSQVARR---KLYRKEDESGHCQMVDEHGGCLL--DIPLGAEDH-----LVPVWVQRILQK  
**IpAbcc5-like** SMTFALKVTELEVALSFGSIANRFRQFVLLMDDQEVHCGKMDPENVBERDATLNNKARPPAKRAKQPGKRCGRVLRBEKLSLHISDEEAKKAGGEPNAEHLHLHMEQESQSTTIC-----STQVRFPLHG

**OmAbcc5a** TLRLCINRVRQCELLVCGCSVSGKRTSLMSAILGOMTLLGCVALLRGLIAYVSCQAWILNATLRNINILFCQVQEDRYQSVLSACILREDLALLSADITEIGERCANLSSGGQQRVSLARALYSLSVYLLDDPLSALDAVAN  
**OmAbcc5b** ALRHLNICIKKKSVLGICGVSQKSSLLSALLGOMTLLGCVALLRGLIAYVSCQAWILNATLRNINILFCQVQEDRYQSVLSACILREDLALLSADITEIGERCANLSSGGQQRVSLARALYSLSVYLLDDPLSALDAVGS  
**IpAbcc5** TLRLCINRVRQCELLVCGCSVSGKRTSLISALLGOMTLLGCVALLRGLIAYVSCQAWILNATLRNINILFCQVQEDRYQSVLSACILREDLALLSADITEIGERCANLSSGGQQRVSLARALYSLSVYLLDDPLSALDAVSN  
**IpAbcc5-like** TLRFVQLAVRRCGLVGVCGVSGKSSLLSALLGOMTLLGCVAVANGAYPAQCAWILNATLRNINILFCQVQEDRYQSVLSACILREDLALLSADITEIGERCANLSSGGQQRVSLARALYSLSVYLLDDPLSALDAVAS

**OmAbcc5a** HVHNRKIKRQLKRTVAFVTHQLQYLVDNITLMLRCHTVECGNENMLRLNGLYAMFVRHGLCTPNIEAPSQKKGQRSAD-SKQGSVKITMPSISDNG----FEQQSGCVAVPVEQHYMGFCQGGASCLLITLVFLIL  
**OmAbcc5b** HIRSKAIRGAAGKTVAFVTHQLQYLPECDIWLMLKGRGAGGHAQLMKSCHEVALFENSTQHNLKIKENKQKQRDAPKRAESQLEVSKFIPK-MENKREPLMKAEBCSCAVAVWVYAVIYHAGGGIIVLWVWVPEPIS  
**IpAbcc5** HIRNIVIKRQLKRTVAFVTHQLQYLACEVIEVREGSITSCGSEHLLNGLNYAMFNLCGLCTHFDLIPKKNAGSSLRKGENARAGSVKREKPPSKDNGLMCAEBRCRGSVPCAVRYVYICALGGVYVPHIHALFIL  
**IpAbcc5-like** HLEHSEIRSAAGEKTVAFVTHQLQYLACEVIEVVMKRCIIEEGHMAQLARGRIYATLFTSQENLVRKNIKVCQGGEEKDSPLCASVISAARQPAESTRGDCVCAEBRCRCAVTVAVYATYIRAGGGLIATINWVLFIL

**OmAbcc5a** NVGSPAFCHWVLSFWINQSGSNITVWAGNSRPSMSRNRFMMQCRASITSSMGUNLFFKGLRGLFVVKVTRASSLHDLDFLHILIRGPMFFDTTPTGRIIRFRSKDMDEVVRIIPFCHEMIQNVILVFCGLGVIVFVFW  
**OmAbcc5b** TNGSDAFSNWVLSFWINQSGSNITVWAGNSRPSMSRNRFPHIYYSVVYVSMGAALLKRTVGRGLVFRVQTVKABSVLHDKLRLNLLSMPMFFDTTPTGRIIRFRSKDMDEVVRIIPFCHEMIQNVILVFCGLGVIVFVFW  
**IpAbcc5** NVGSDAFSNWVLSFWINQSGSNITVWAGNSRPSMSRNRFPLRYAYRITVSMGAINLLKRLRGLIFVVKVTRASSLHDLDFLHILIRGPMFFDTTPTGRIIRFRSKDMDEVVRIIPFCHEMIQNVILVFCGLGVIVFVFW  
**IpAbcc5-like** TNGSDAFSNWVLSFWINQSGSNITVWAGNSRPSMSRNRFPELAYSIVAYVSMGVLLLRVSRGVVFRQVTRASSLHDLDFLHILIRGPMFFDTTPTGRIIRFRSKDMDEVVRIIPFCHEMIQNVILVFCGLGVIVFVFW

**OmAbcc5a** FLVETAPLVIVSIVLHSVRVIRELKRRLNMTMPFMSSHISSTIGLLETLCAYGRCEQTFKRYQELLDLNCQAEHYFLSCAMRWLAVALLDLISVALSITLALMVMVMHCGIIPAYAGLAISYAVQLTGLFQFTVRLISETEARFT  
**OmAbcc5b** FLVETAPLVIVSIVLHSVRVIRELKRRLNMTMPFMSSHISSTIGLLETLCAYGRCEQTFKRYQELLDLNCQAEHYFLSCAMRWLAVALLDLISVALSITLAVALLVVMVMNCPAYAGLAISYAVQLTGLFQFTVRLISETEARFT  
**IpAbcc5** FLVAVGPIVILILLHAVSRVIRELKRRLNMTSPFSHISSTIGLLETLCAYGRCEQTFKRYQELLDLNCQAEHYFLSCAMRWLAVALLDLISVALSITLALMVMVMHCGIIPAYAGLAISYAVQLTGLFQFTVRLISETEARFT  
**IpAbcc5-like** EFSILPITAFBYILNIRVIRELKRRLNMTSPFSHISSTIGLLETLCAYGRCEQTFKRYQELLDLNCQAEHYFLSCAMRWLAVALLDLISVALSITLAVALLVVMVMNCPAYAGLAISYAVQLTGLFQFTVRLISETEARFT

**OmAbcc5a** AVERTIHYYTQSSCEAPAR-VKGRSPEFPWQCGLIVFSDVELAYCENLPLVNLNISCIVRPREKRVGVGRGSGKSSLVVLFRLVBCGGGSVLDIGVINISEIGLAILRSKLSIIIPCEPVLESGTVRSNLDPEFNRYGEMDITWDA  
**OmAbcc5b** SVERTIHYYTQSSCEAPARQSPREIIPAPSFPQCCKITFCNVNMYEVDLPLVNLNLSLITCEPETHIGVGRGSGKSSLVVLFRLVLESGGSIIDIGVINIAGIGLAILRSKLSIIIPCEPVLESGTVRSNLDPEFNRYGEMDITWDA  
**IpAbcc5** SVERTIHYYTQSSCEAPAR-VNKNAPSPFPQCGLIVFSDVELAYCENLPLVNLNISCIVRPREKRVGVGRGSGKSSLVVLFRLVBCGGGSVLDIGVINIAGIGLAILRSKLSIIIPCEPVLESGTVRSNLDPEFNRYGEMDITWDA  
**IpAbcc5-like** SVERTIHYYTQSSCEAPARQSPREIIPAPSFPQCGLIVFSDVELAYCENLPLVNLNLSLITCEPETHIGVGRGSGKSSLVVLFRLVLESGGSIIDIGVINIAGIGLAILRSKLSIIIPCEPVLESGTVRSNLDPEFNRYGEMDITWDA

**OmAbcc5a** LERSHMKVQSLEKQHLSEVVENGENFSVGERQLLCVRRLLRCKVKVLLDEATAAMDHEDLIQTETRSRHHCTTILTAHRIETVIAACRIMVLDGQWVEFDEBSHLLANENSLCSMAAVSKVSVRG-- 1,383  
**OmAbcc5b** LERTHVKELYSQLEKQHLSEVVENGENFSVGERQLLCVRRLLRCKVKVLLDEATAAMDHEDLIQTETRSRHHCTTILTAHRIETVIAACRIMVLDGQILEFTAPALLADERSRFRMTESESNQNV---- 1,384  
**IpAbcc5** LERTHMKVQSLEKQHLSEVVENGENFSVGERQLLCVRRLLRCKVKVLLDEATAAMDHEDLIQTETRSRHHCTTILTAHRIETVIAACRIMVLDGQWVEFDEBSHLLANENSLCSMAAVSKVSVRG-- 1,423  
**IpAbcc5-like** LERTHINDVYSQLEKQHLSEVVENGENFSVGERQLLCVRRLLRCKVKVLLDEATAAMDHEDLIQTETRSRHHCTTILTAHRIETVIAACRIMVLDGQILEFDEBSHLLANENSLCSMAAVSKVSVRG-- 1,399

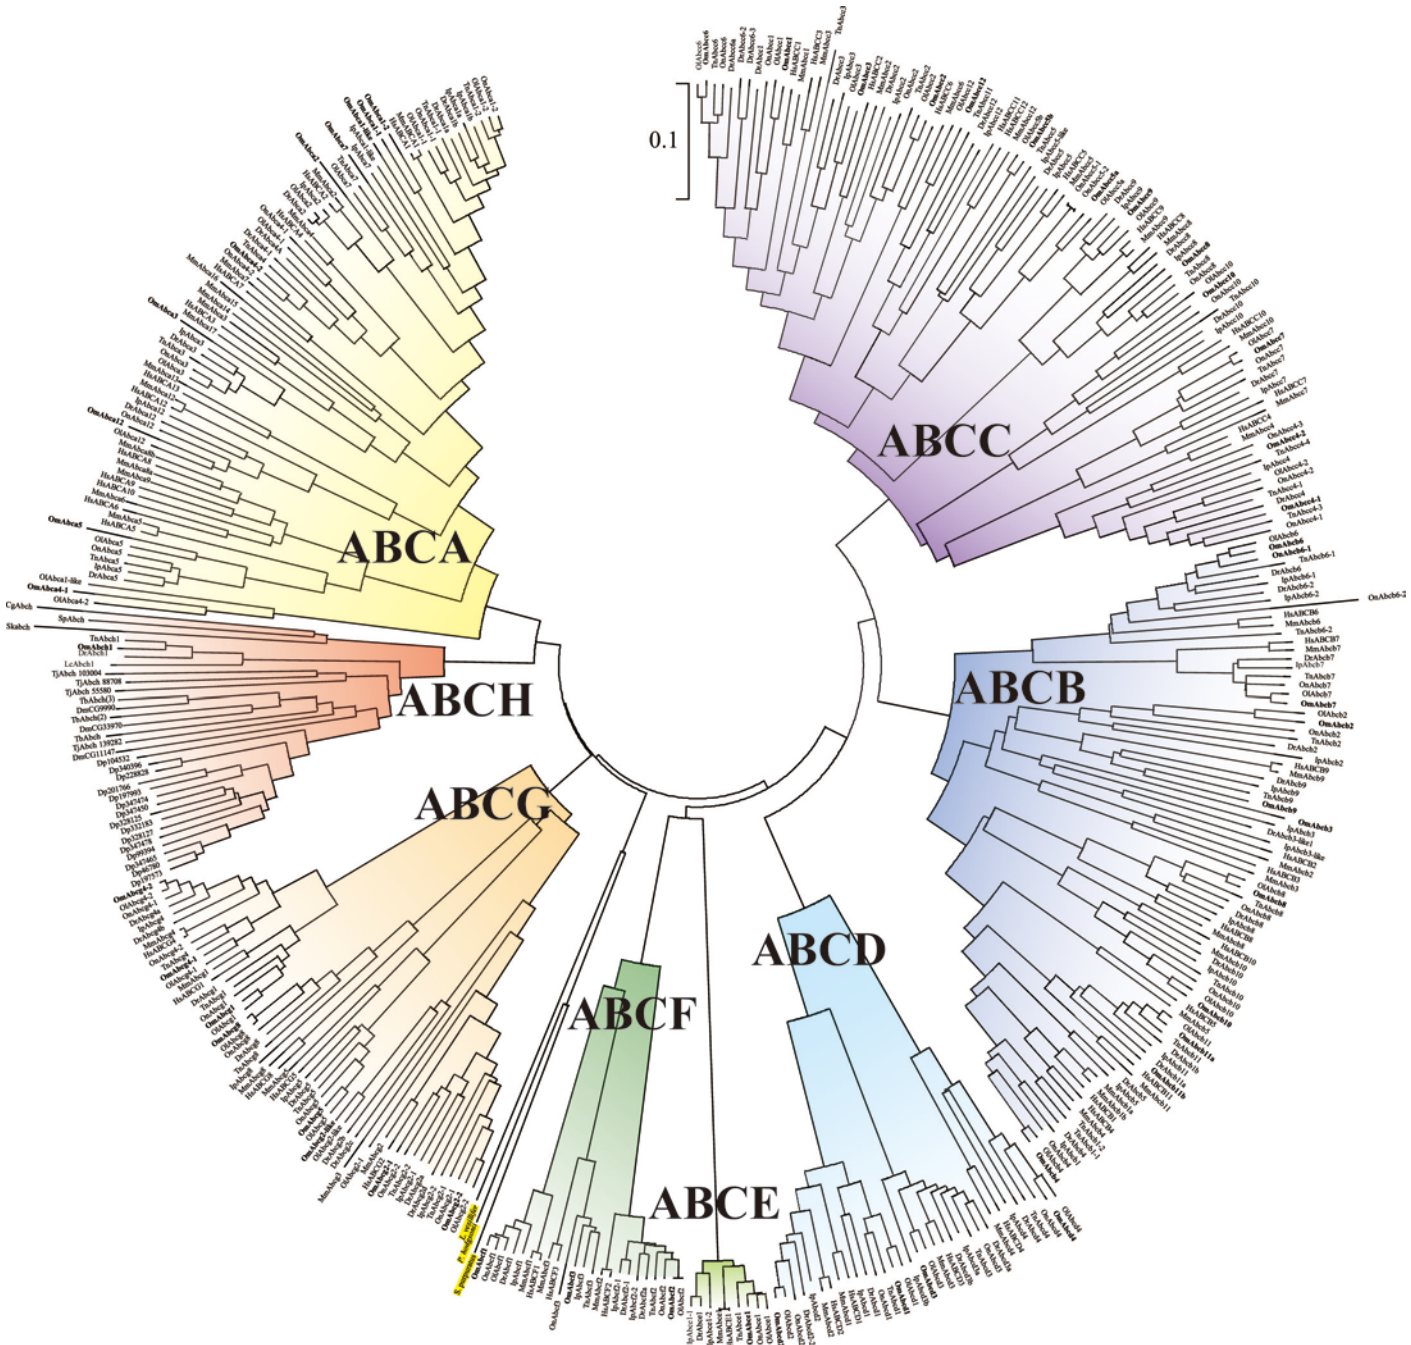



Other  
invertebrates

Fish

Arthropods

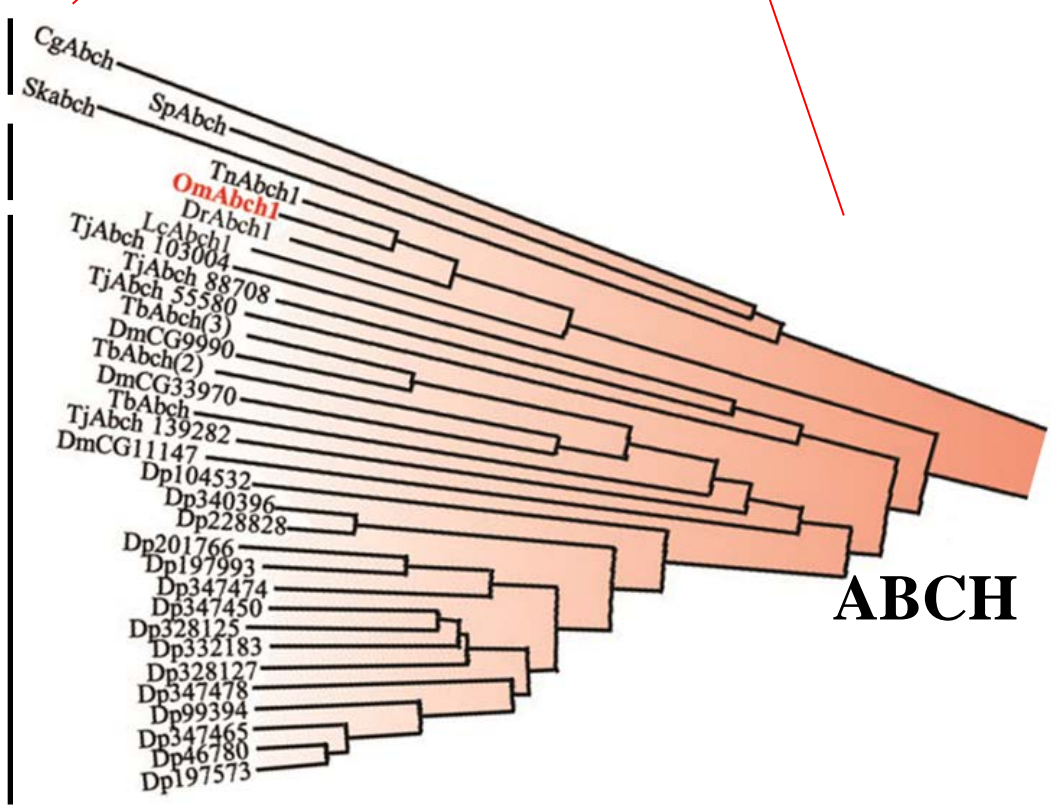

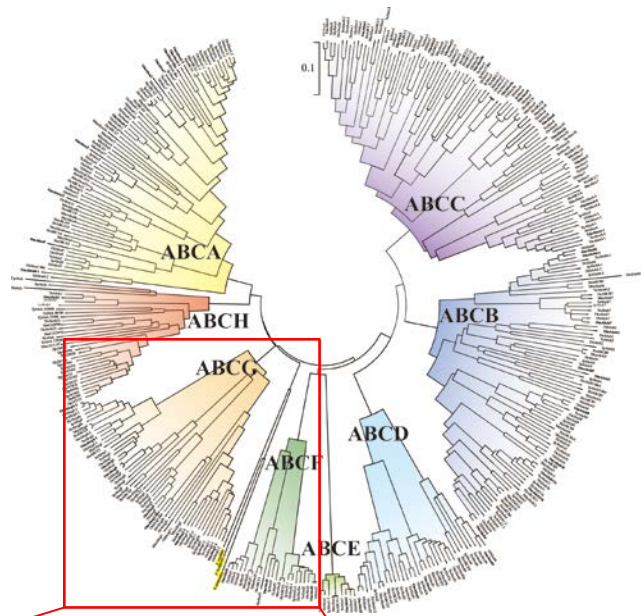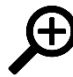

ABCG

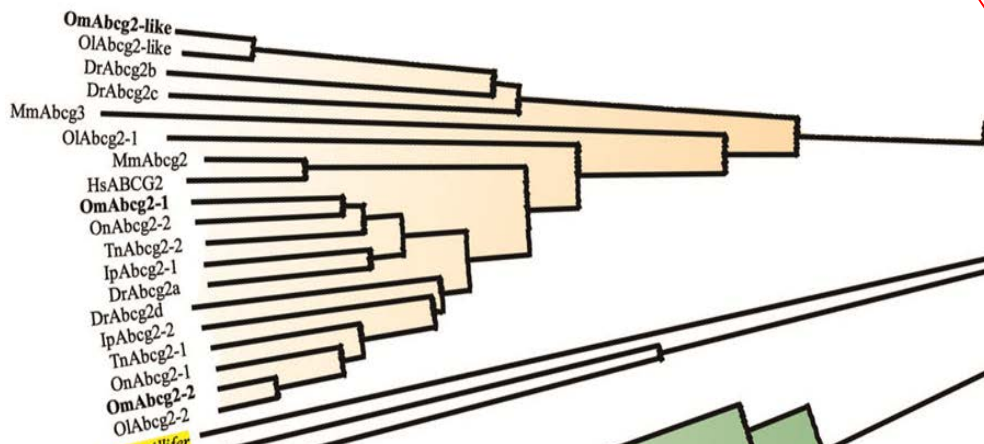

*L. vexillifer*  
*P. hodgsonii*

*S. purpuratus*

ABCF

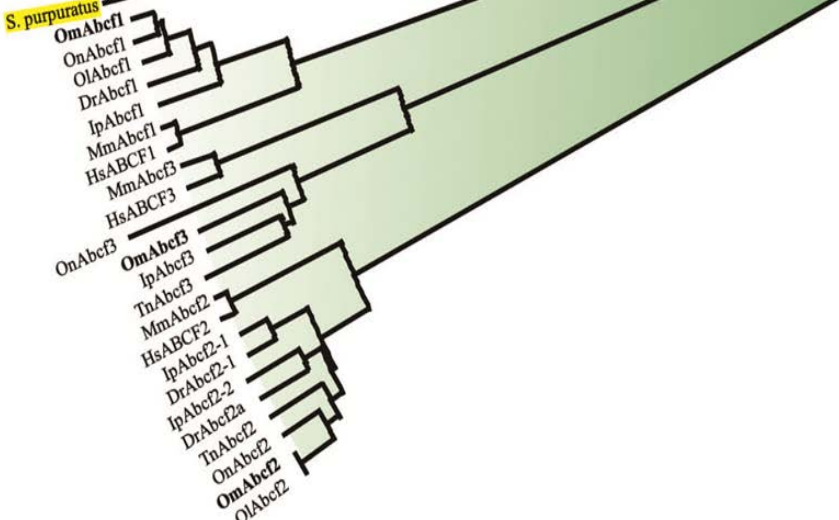

Supplement: srep15409-s1.pdf [file srep15409-s1.pdf]
